# Supplementary material for: Construction of Attenuated Strains for Red-Spotted Grouper Nervous Necrosis Virus (RGNNV) via Reverse Genetic System
Source: MDPI journal article supplement (doi:10.3390/v14081737), 2022-08-06
Supplement: s1 [file s1]

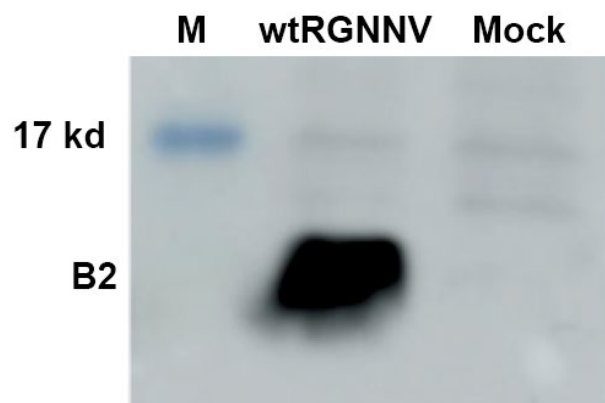

**Figure S1.** Immunoreactivity of B2 antibody. Positive B2 band was detected by anti-B2 polyclonal antibody in wtRGNNV infected SSN-1 cells but not in non infected SSN-1 cells (Mock).

### A. Sequence of RGNNV RNA1

tgaacatcacctctgtgctgttgagtaatcacttacgcaaggttaccggtcagcttagacaacgacaagtctacgccatcgctgcgtttgagtttgactcgacgcagcatgtctgagcagcattttgtgtgtacacaggctaccgcctgttgacctcaaaatggctcgcggaccgtgttgaggattatcgccaacgcatacgcgtgagaagaacaaattctcgtgtatgcggccatgatccgtactcagatccagcgggaaatggagctgggtgcgcatactcggtgcgcaaaggccattccaccaggaagctgctactgagcgtaacagcgccactgagaccatgtctcgggtgtggtggagaaaatgtggctacgagccatatgtcatttctccatcaccccgtagggttgataccacgggtcacgtcagttctatagtctgcagattttcgccaagactaccgtcgtgatgacatcaccgaccgtcacatcattgtgatgactgatgttgactactacgtggacatgcatgagttgattggtttgggtgttccgatatgtgtgtacaccttccagccaagtactgtgtccggagaggttaaggatggttactttaccatcactgacgactccggtcactaccggtgtgtcggcggggaaggatgtgcgccaccgcatctggaactacaaccaggataccatgtatgtgtgtcctccgacctcgtggtttctggggaaltgatgcagattctcgtgacatcactggtgtcacccgcgactgtagtctttcttacaccaagctcgggtattgcgcccttggcgacctgttaccatgttcaccggtgatcaattcaagatgggtgagcatcgtaaacatcgtgtcaattgtgcccttgcaacttgccgttcaaacctgtcaagatcagtgagtatgtgtgtgagttggagtatatgcgtaccaacagcgcgaacaacattgccaacttaacgcagtcacttacatctctgagaatgggccaactcatcagctcgggttgggaaggcaatttgcaggctccaactcctctgcaggatttcgagaacatccgcactgcatacgaactgtccaaaactaacaactgtcagatactgttcgccggtcagggcgcccggtgcaaggaggcagctatcatccataaatgtctccaagccgagtggtgccgtcgcagcgagggtcgtgcataaacctggcgatctcgtcgtcattaccaagcagttggtagtgcttacgacactgatccagccgagcagggcgaagtgttacgcccgtagtatgtctctggaccggtgactcaaactgtctatttccaagttagtcacgttccaacgagcttgccacaatcgacggtcgtattgtgtgtccgcaagccaaggcgaagagccgcgagcacataaacctaaagatgcgcaaagtggctagggactctgtgcaccatctgtgtccgattgccggcactggccgtccctacccccctcacgtatgtcgaggagcagcagaccaagccgttagcggggctcggaatgatgtctaaccgatatacagtgagttcactatgatggtcaaagcgttccaaaagaagaagcatacaacgccccaaattatccagggaacattcaaccgttccgcatacccaaacgtcaagttatccagctacacctacgcttcaaagccagtggttccagcatgttccgtggtacatgccaacgcacacaccagctgaatcgtcgtacgcagtgcaaaacttggtcgtcaagttccactgagctggttgaaccgactacgacaagttcgtatggcacatttctgcgtttatgctgtagtgctcgaatttgctatctataagcgtcgggttccactggaccacttgcagagttacaactttatggctaatgagatccaagcacctgctgttacacgactgggcatcaagtatgacctgattgcagtcgcctcagtggttctgtctcacaaccgacggaaacagcattgctaatgctttcgtctacacttctgtggtcgcagtggtggcatggatgatgatgaagcttggcttggatcggcattgtgtacgggtgatgatgggtcctcgtatgtggttaatgtttcaaacgagctcctcaccaacactgcttctccctcggttggactgaagatagtgaatcgccgccacgcggctctccagtgacatttctgtctcagtgataacctcgcacttgggtcctcacccggtcctcgtcagtcgccattagaacattgttgaattgcacaccacctgtgatacccgatcagagattgacgacattggctgggctaaagacacaggcatatttggctcactgatagcaagacacctttatgttcattggtgcgggcttatcagagaaattgcactgcacgtgtgtgtccagtatgcagactacgctgacattccattctgggtgaagaacgacgaccacgttggcaactcgtggccgcagctcgaatccgatgactggaatgacattgtagccaacgagcttggcgtcaccaccgctgagctgttgaagcatcttgcacttctggatgcttatgctgtgtcccatcagtggtcctcccacgtctgacaacatcaatcatttggaaaccaaaagatgtctgtcgcattagatggggagatccaagccggtcctagtcaaaaacaaactagcaaggatggaacaaatccaacaagcgatcgatcagcacctcgtcgagctcgagcagctcttccagggtgatgatggacacgcgcgtcgtctcgtggcgagtgaccgcgatccaggtaaacgagatgcgcacgttctgtgataagcgccacgcggcagctcgcgcctacacgtcctgtcacgcgggttccacaccttccagccgtgatcgagggaaccgatggagacggactaggccgagctcgtgtgcgtcagcgtcagcgacgtcgcactcaagtgtagacaggtcacttgctgtctccacaccttggaccggttgggtcccttaacagctttagctgtcctacgcttcggc

### B. Sequence of RGNNV RNA2

taatccatcaccgcttgcatacaaatggtacgcaaaggtgagaagaaattggcaaaacccgcgaccactaaggccgcgaatccgcgaaccccgccgacgtgctaa  
caatcgctcgcgtagtaatcgactgacgcacctgtgtctaaggccctgcactgtaactggattggacgtgggaccaatgacgtccatctctcaggtatgtcgagagtctcc  
caggccgtctctccagccgggacaggaacagacggatacgttgtgttgatgcaaccatcgctcccgacctctgccaacgactgggacacgctgctagaatcttcag  
cgatacgtgtgtgaacactggagttgaaattcagccaatgtgccccgcaaacacagggcggtggtacgttgcctctgctgctgatccaactgacaaacgatcacac  
ctcgacgcgcttcaacagcaactcgtgtgtgctgtgtccaaatggtgggaaagcagaacagtcgacctgacacccgcacgctctctggaacctgctcgggaaa  
ggcgacgcgtctcacgtcacctgtgcggtgatactctgtgtgcgaacaacactgatgtgttcacacgtgtcagtgctgtgtgcgtgaggtgttcgactgagcgttcca  
tctcttgagacacctaagagacaccgcctcccatcatgacacaaaggttccctgtacaacgattcccttccacaaatgactcaagtcacatctctctaggtaccaccca  
ctggacattgccctgatggagcagctcttcagctggaccgtccgctgtccattgactacagccttggaaactggagatgttgaccgtgctgtttactggcacctcaagaagt  
tgtcgaaatgctggcacacctgcaggctggttctgctggggcatctgggacaactcaacaagacgttcacagatggcggtgcctactactctgatgagcagccccgtc  
aaatcctgctgctgttggcactgtctgcaccaggggtgactcgaaaactaacggggtcatccggttccctagtgcgtatcgttgatgaccaattcgaacaattgattaaa  
gcactaacaataataataaagaatacaacaacaaaactgaaattggaagaatagaagcgaaattgaaccactcgctagcaaattaaatgacaaagcacc  
aaggagggtgcgattgtattgtgttacccctgacggcgctaccggctacgctgaaggcctatacacggctggaagcgcgcgcgctgcttaactgggtgccagtggtac  
cagtcgtatccaacgccgaggaagtcctcttgggctgttgggttaccgttagctccgcgcagtgagcaccaccgccatgtggttaaattggccgctgatcgcttctaact  
gtgggt

**Figure S2.** Sequence of RGNNV RNA1 and RNA2.

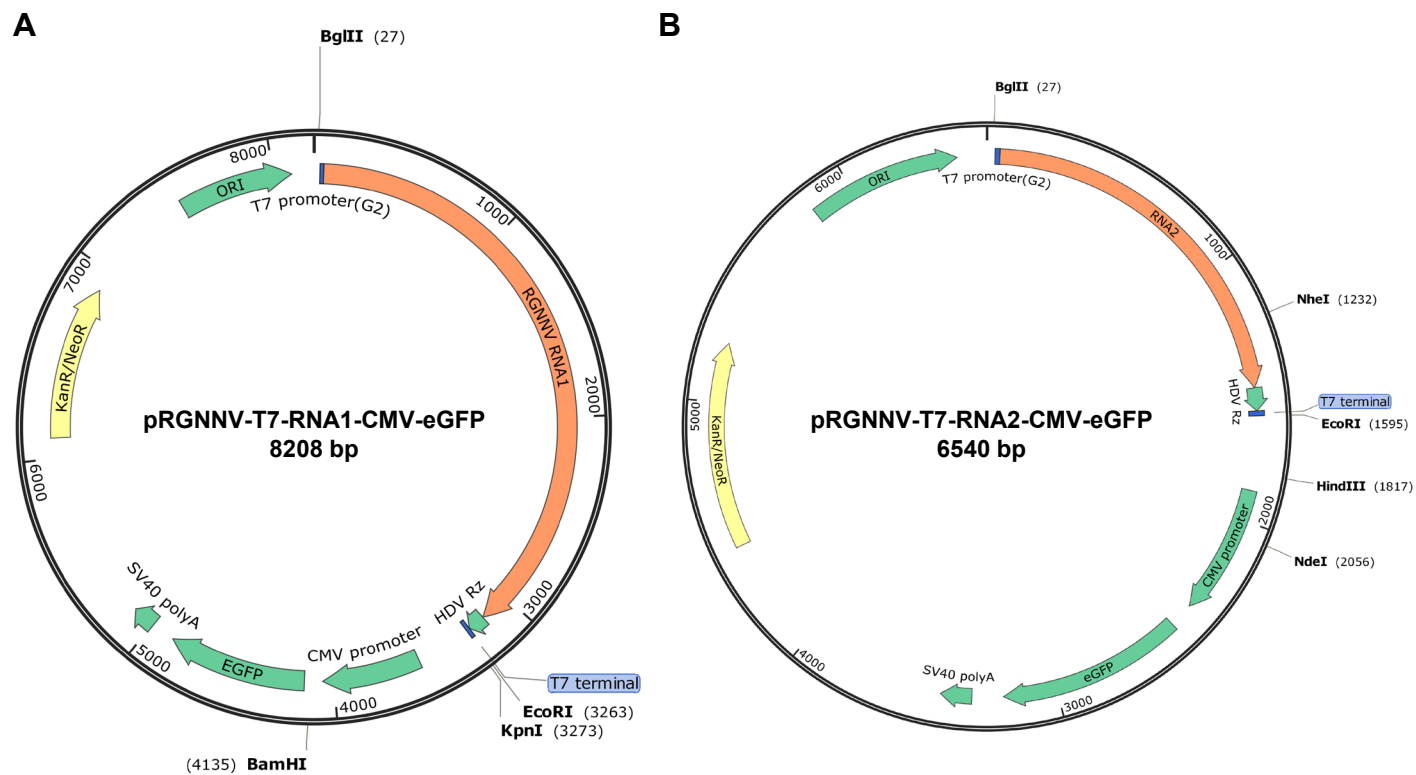

**Figure S3.** Plasmid maps of pRGNNV-T7-RNA1-CMV-eGFP and pRGNNV-T7-RNA2-CMV-eGFP.
